# Supplementary material
Source: Springer Nature journal article supplement (https://www.springermedizin.de/resource/supplementary/12875_2010_563_MOESM3_ESM.pdf/9434950)

How many of the preventive activities on the sheet have you and your doctor addressed?

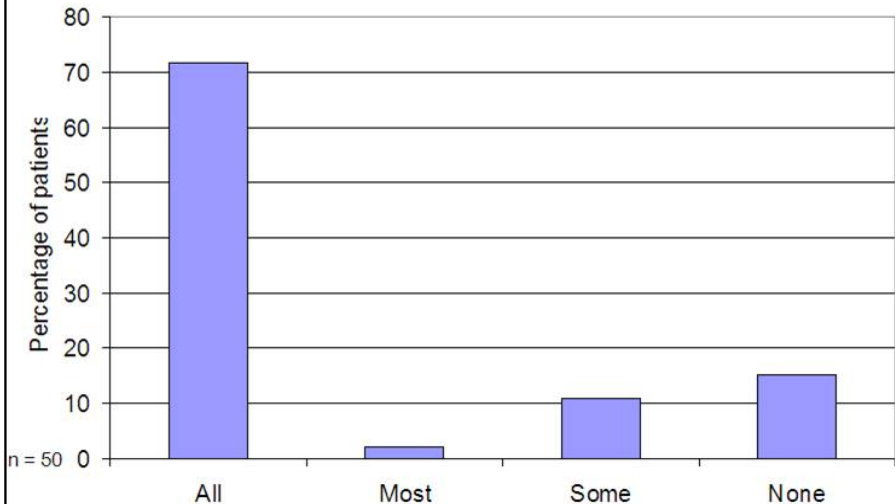

Supplement: MOESM3 [file 9434950]
